# Supplementary material
Source: PubMed Central journal article supplement (PMC3491143)
Supplement: NIHMS388091-supplement-1.pdf [file NIHMS388091-supplement-1.pdf]

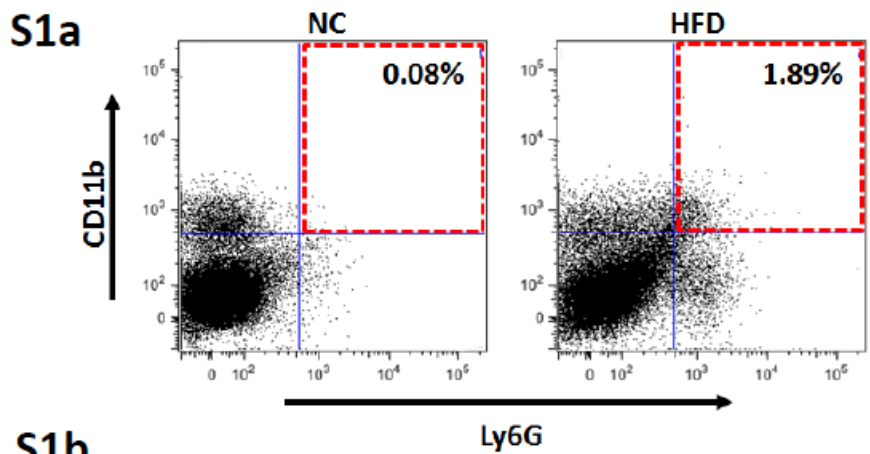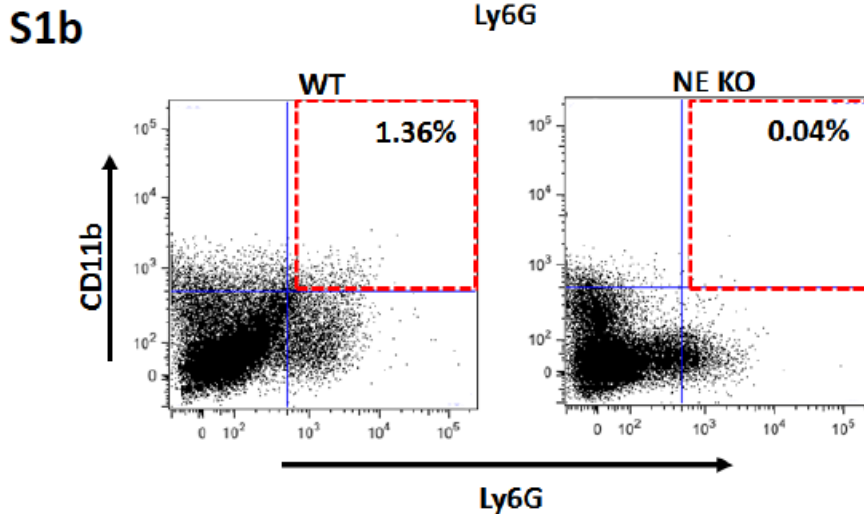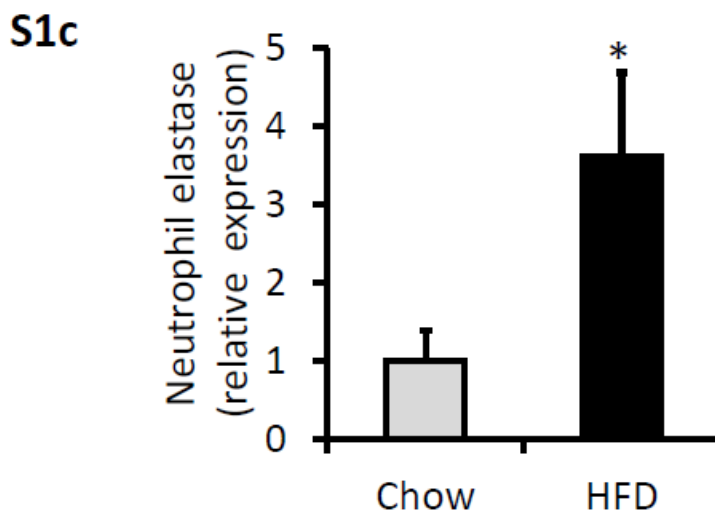

**Figure S1:** Dot plot representation of Cd11b versus Ly6g expression for FACS data obtained from F4/80 and Cd11c negative SVCs of NC and HFD (a) or WT and NE KO (b). Scattergram is representative from three independent mice from each group. (c) Gene expression of NE normalized to actin in chow and HFD mice. \* indicates significance at  $p < 0.05$ .

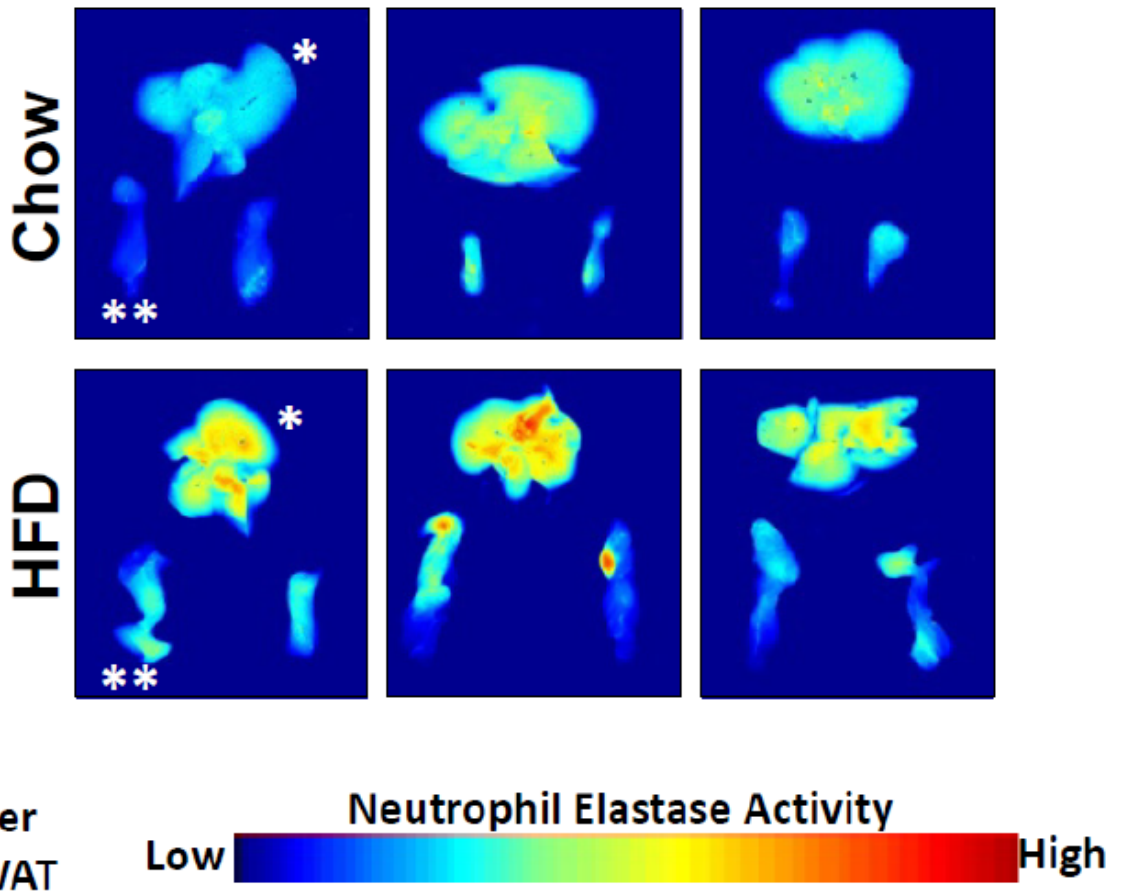

**Figure S2:** Representative images of liver and eWAT from chow and HFD mice showing NE activity.

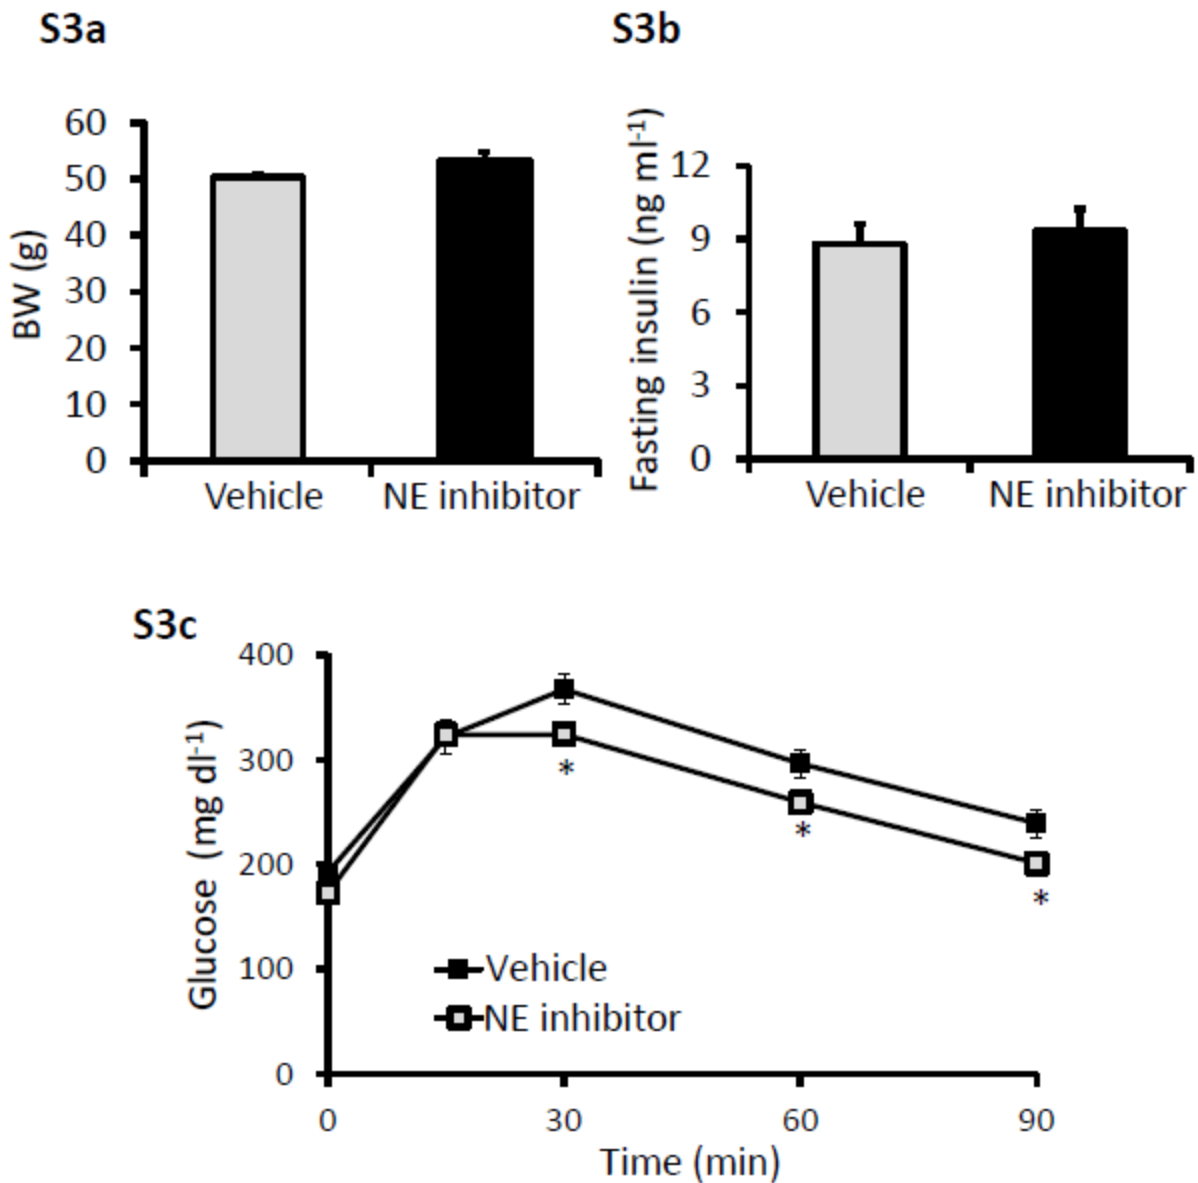

**Figure S3:** (a) Body weight, and (b) fasting insulin in HFD mice treated with NE inhibitor for two weeks. (c) IP-GTT on 10 week-old fasted animals fed HFD for 2 weeks. NE inhibitor was administered daily for 2 weeks. \* indicates significance at  $p < 0.05$ .

**S4a**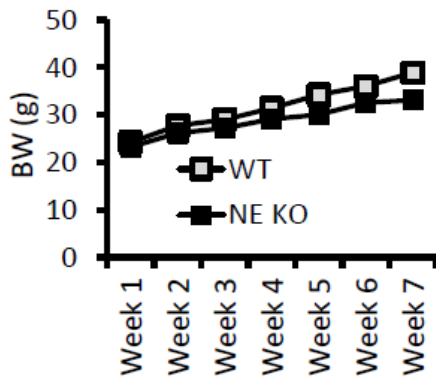**S4b**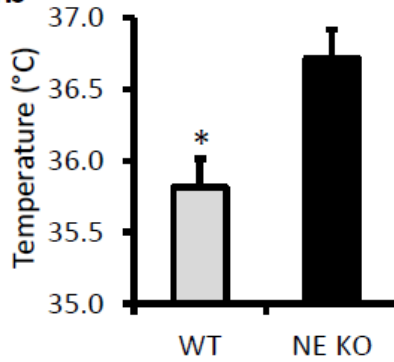**S4c**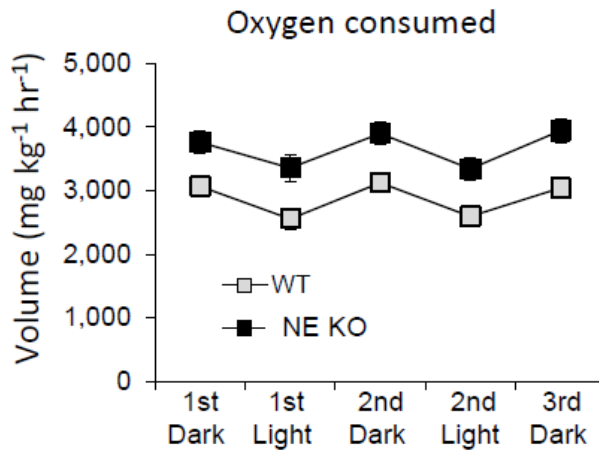**S4d**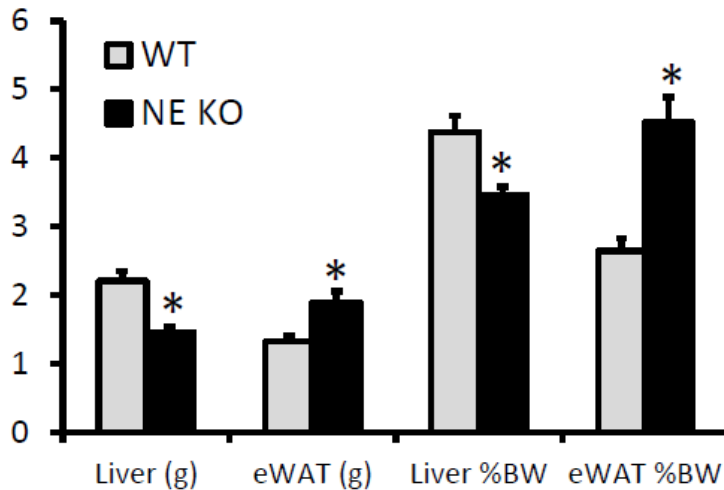**S4e**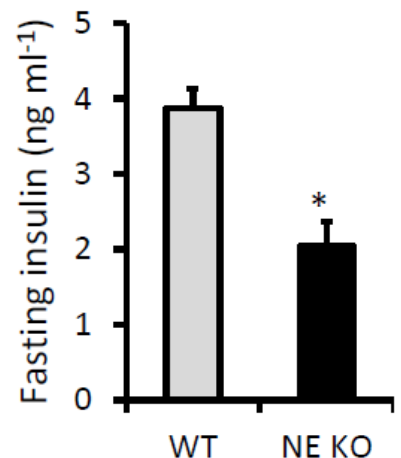

**Figure S4:** (a) Body weight of NE KO and age matched WT mice from 8 weeks of age. (b) Rectal temperature in WT and NE KO mice. \*  $p < 0.05$ . (c) O<sub>2</sub> consumption WT and NE KO mice after 48 h of acclimatization in CLAMS chambers. Measurements were done between 8–9 weeks on HFD. (d) Liver and eWAT weight expressed in absolute values in gm, and expressed as a percent of body weight in WT and NE KO mice. (e) Fasting insulin in NE KO and weight matched WT mice on HFD for 10 weeks.

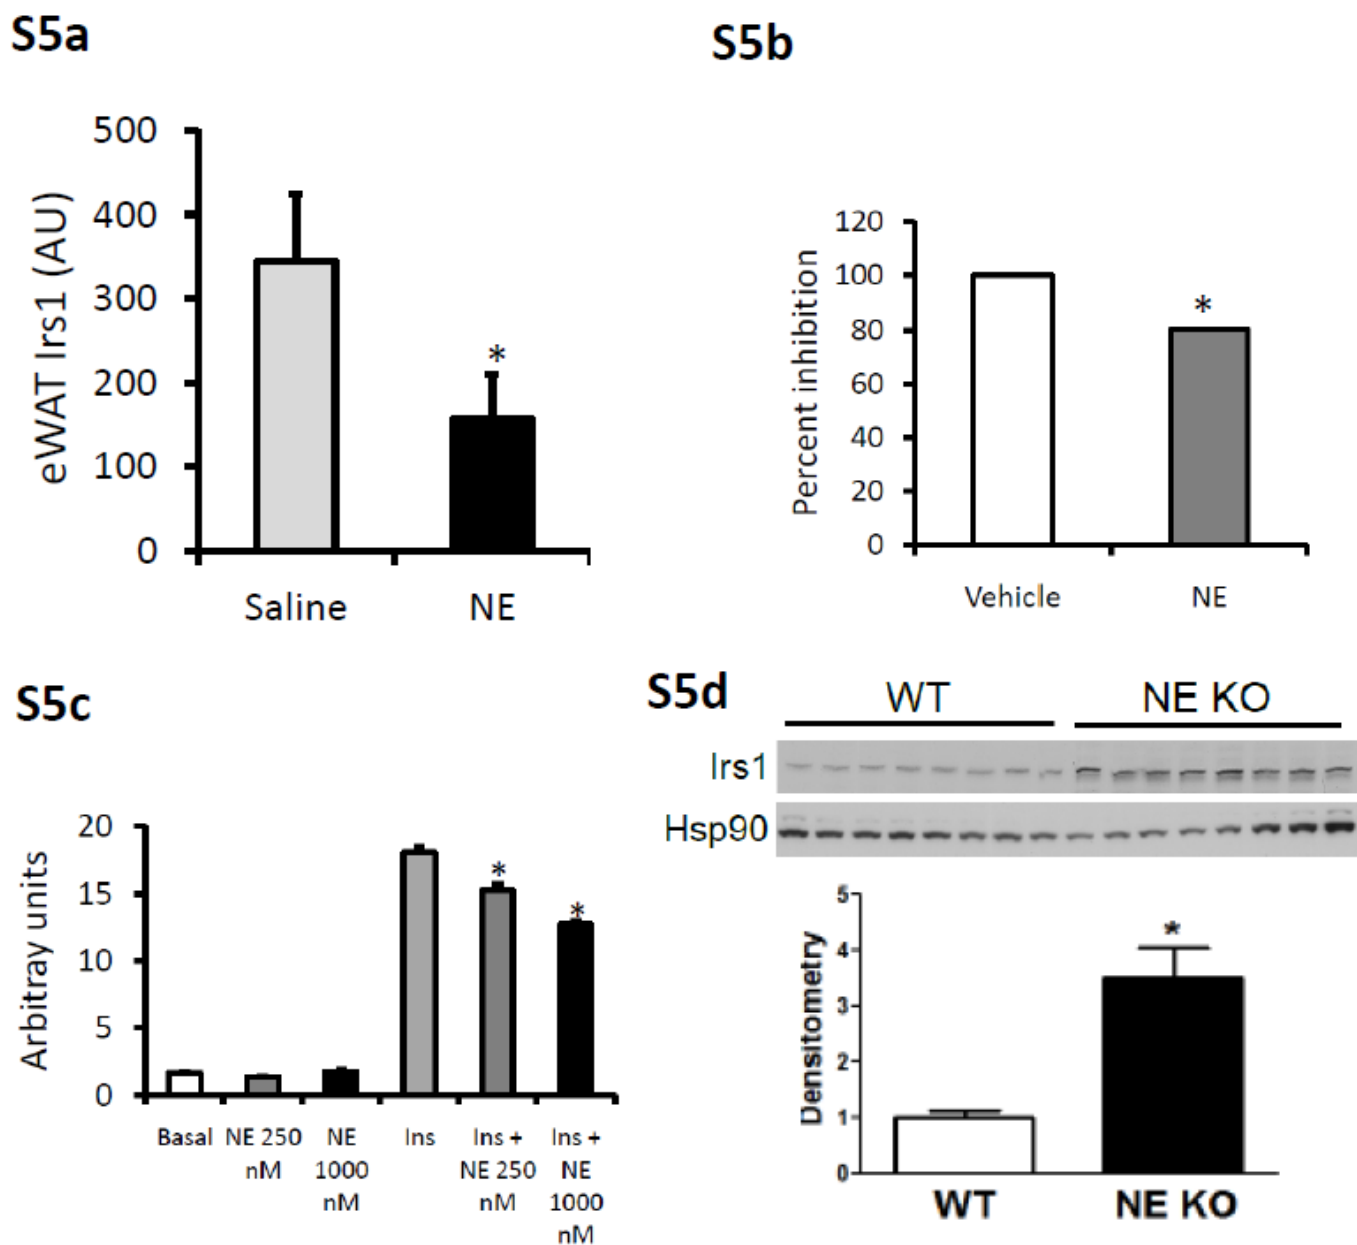

**Figure S5:** (a) MSD analyses for Irs1 from eWAT of fasted chow animals administered recombinant NE. (b) Irs1 and (c) p-Akt/total Akt in 3T3-L1 adipocytes treated with recombinant mouse NE for 6 h. 10 nM insulin was added for 5 min and MSD was used to quantitate protein. (d) Representative western blot showing total Irs1 and Hsp90 in eWAT of WT and NE KO mice on HFD for 12 weeks. Densitometry shown below the blot. \* indicates significance at  $p < 0.05$ .

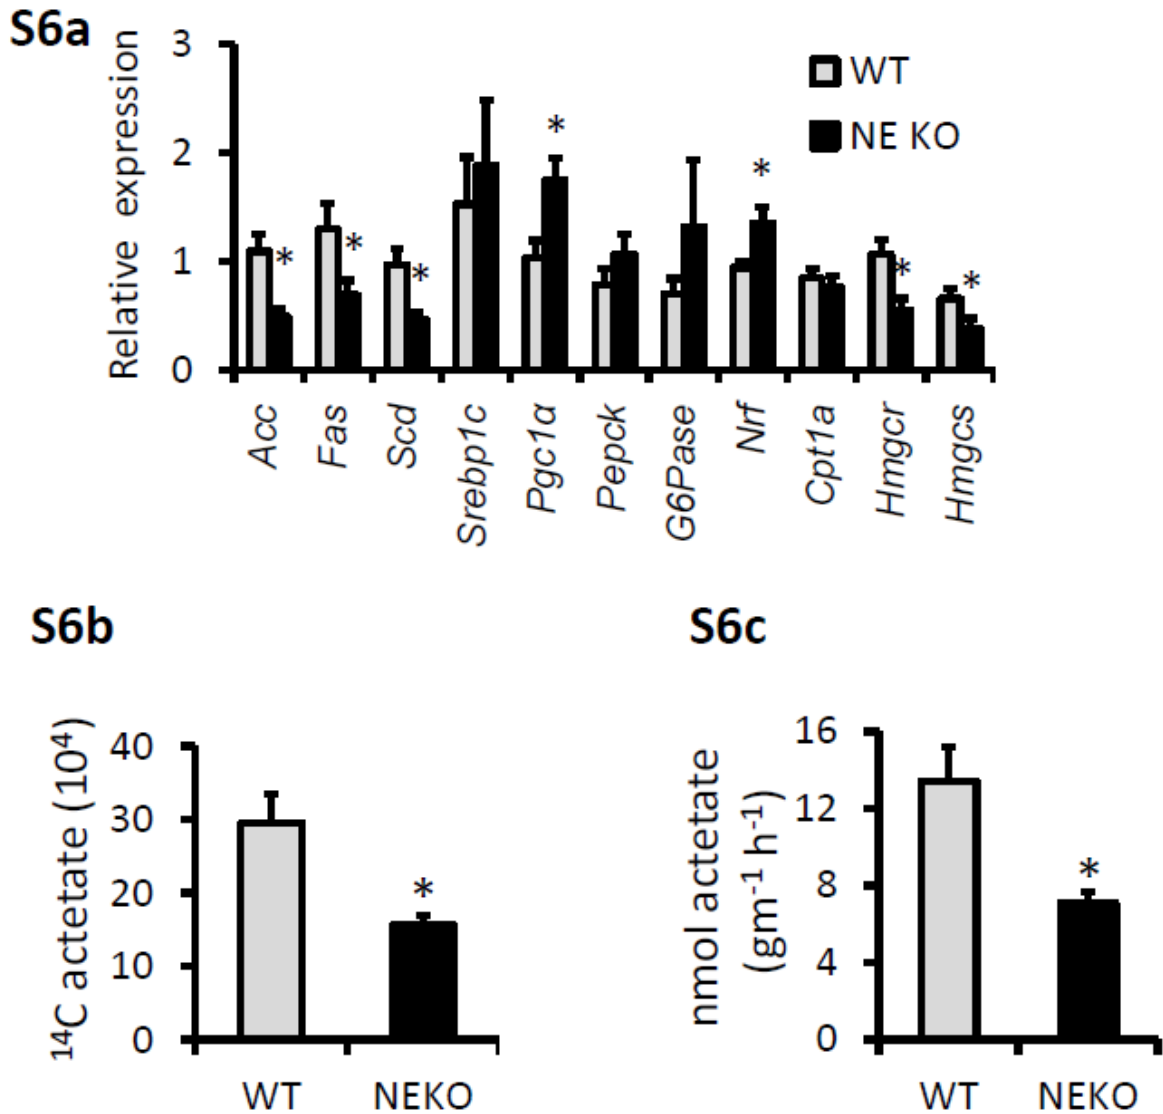

**Figure S6:** (a) qPCR for hepatic gene expression in NE KO and WT mice on HFD for 12 weeks. Data normalized to 18S rRNA, and  $n = 8-10$  animals in each group. (b) *Ex vivo* hepatic lipogenesis and (c) *ex vivo* rate of lipogenesis as measured by <sup>14</sup>C acetate incorporation. Data obtained from  $n = 6-8$  liver samples per group.

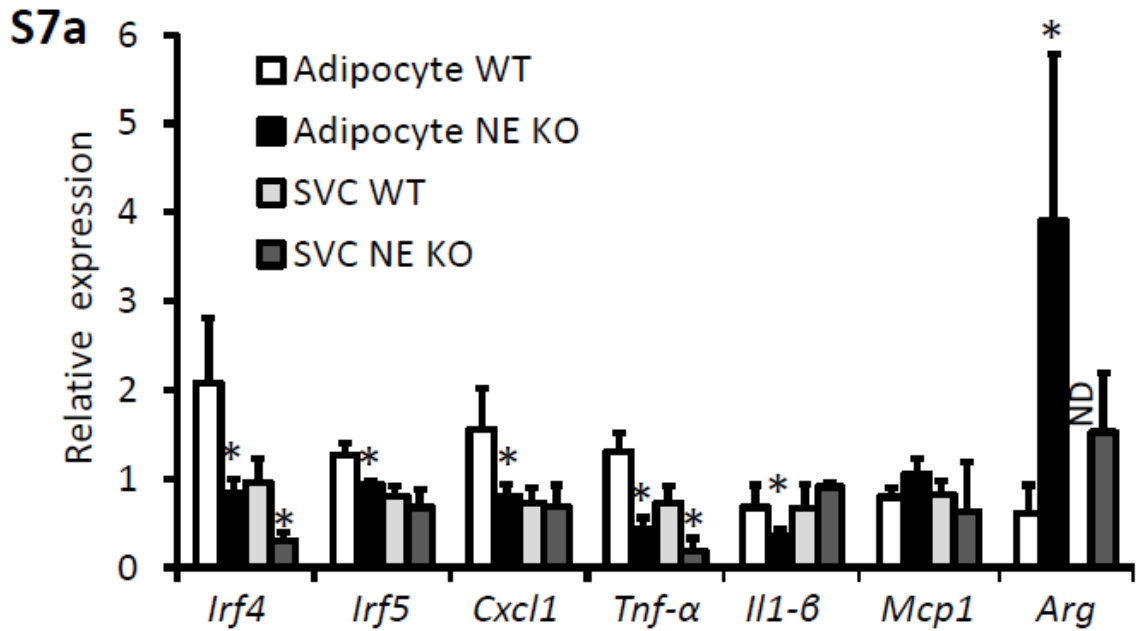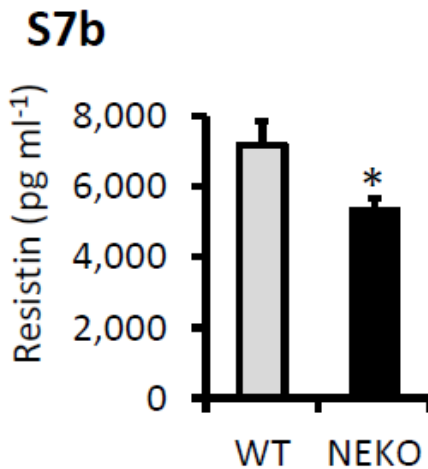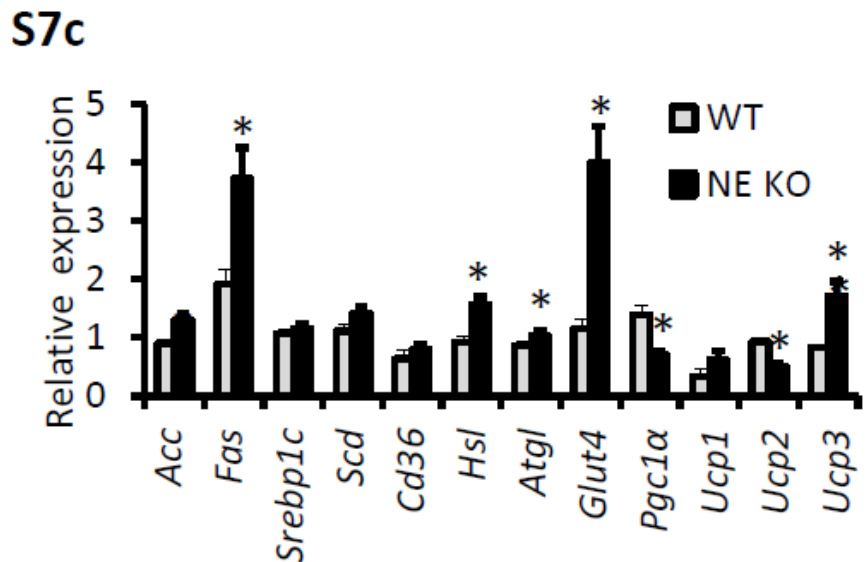

**Figure S7:** (a) qPCR of genes from stromal vascular cells and adipocytes from eWAT of WT and NE KO mice.  $n = 6-8$  animals per group. \* significant at  $p < 0.05$ . (b) Serum resistin concentration was measured using Milipore Luminex kit.  $n = 7-8$  animals per group. (c) Gene expression in eWAT from WT and NE KO mice on HFD for 12 weeks.  $n = 8-10$  animals per group. \* significant at  $p < 0.05$
